# Supplementary material for: Decision Support Intervention and Anticoagulation for Emergency Department Atrial Fibrillation: The O’CAFÉ Stepped-Wedge Cluster Randomized Clinical Trial
Source: PubMed Central journal article supplement (PMC11541643; doi:10.1001/jamanetworkopen.2024.43097), 2024-11-06
Supplement: jamanetwopen-e2443097-s003.pdf [file jamanetwopen-e2443097-s003.pdf]

## Data Sharing Statement

Vinson. Decision Support Intervention and Anticoagulation for Emergency Department Atrial Fibrillation. *JAMA Netw Open*. Published November 06, 2024.

doi:10.1001/jamanetworkopen.2024.43097

### Data

**Additional Information:** ClinicalTrials.gov Identifier NCT05009225

<https://clinicaltrials.gov/study/NCT05009225>

**Data available:** No

### Additional Information

**Explanation for why data not available:** We will share aggregate data, but we are not able to share individual patient data.
